# Supplementary material
Source: PubMed Central journal article supplement (PMC2775264)

## Supplemental Figure 1

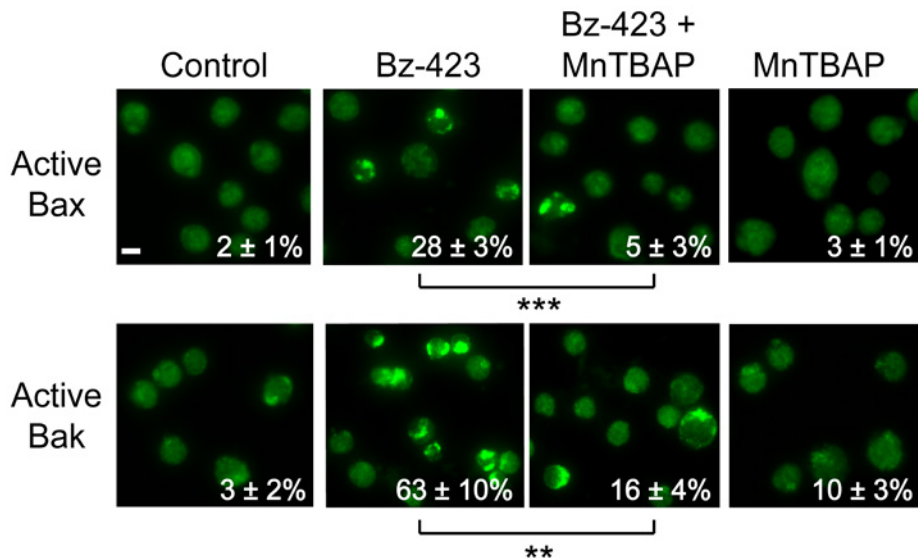

Supplement: supp_109.156422_JPET156422_Figure_S1.pdf [file supp_109.156422_JPET156422_Figure_S1.pdf]

## Supplemental Figure 2

**A**

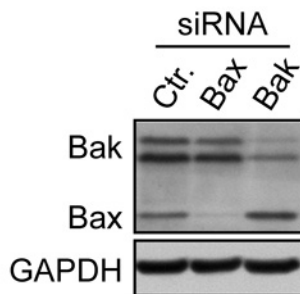

**B**

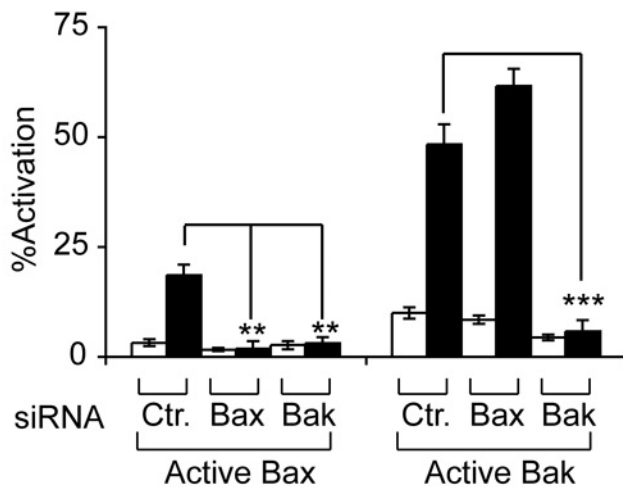

Supplement: supp_109.156422_JPET156422_Figure_S2.pdf [file supp_109.156422_JPET156422_Figure_S2.pdf]
